# Supplementary material
Source: PubMed Central journal article supplement (PMC3127732)
Supplement: supp_77_13_4553__1.pdf [file supp_77_13_4553__1.pdf]

Supplementary table S1

| Sophorose specific cDNA fragments |                                                                    |           |                                                                                                        |        |        |                                                                      |                              |                                                                                                      |                                                                                                      |
|-----------------------------------|--------------------------------------------------------------------|-----------|--------------------------------------------------------------------------------------------------------|--------|--------|----------------------------------------------------------------------|------------------------------|------------------------------------------------------------------------------------------------------|------------------------------------------------------------------------------------------------------|
| Clone                             | equal                                                              | frequency | best hit                                                                                               | expect | length | TRIRE cDNA                                                           | protein ID                   | InterPro domains                                                                                     | putative function                                                                                    |
| STCD4                             | STCD16<br>STCD22<br>STCD39                                         | 4         | hypothetical protein<br>NECHADRAFT_89138 [ <i>Nectria haematococca</i> mpVI 77-13-4]<br>XP_003039507.1 | 2e-158 | 113 bp | CF885793<br>CF882297<br>CF881092<br>CB908798<br>CB907879             | tr_3405                      | IPR003663<br>IPR005828<br>IPR005829<br>IPR007114                                                     | probable sugar transporter of the major facilitator superfamily                                      |
| STCD12                            | STCD13<br>STCD18<br>STCD24                                         | 4         | G-protein beta like WD repeat protein [ <i>Fusarium oxysporum</i> ]<br>BAD44728.1                      | 3e-76  | 123 bp | CF933888<br>CF933394<br>CF933320<br>CF933194<br>CF932925             | tr_45736<br>( <i>cpc2</i> )  | IPR001680<br>IPR011046<br>IPR015943<br>IPR017986<br>IPR019775<br>IPR019781<br>IPR019782<br>IPR020472 | cross pathway control protein CPC2, involved in general amino acid control                           |
| STCD21                            | STCD41<br>STCD47<br>STCD68<br>STCD70<br>STCD85<br>STCD91<br>STCD96 | 8         | NADP(+)-dependent dehydrogenase, putative [ <i>Aspergillus clavatus</i> ]<br>XP_001269058.1            | 2e-117 | 174 bp | CF869945<br>CB900101<br>CF935099<br>CF879699<br>CF935625<br>CF935683 | tr_123946                    | IPR002347<br>IPR002198                                                                               | GRD1                                                                                                 |
| STCD27                            |                                                                    | 1         | FAD binding domain protein                                                                             | 5e-96  |        |                                                                      | tr_73631                     | IPR006094                                                                                            | probable isoamyl                                                                                     |
| STCD43                            | STCD65<br>STCD73                                                   | 3         | QJ74 protein [ <i>Hypocrea lixii</i> ]<br>CAA64974.1                                                   | 0.0    | 162 bp | CF886467<br>CF882327<br>CF881368<br>CF879527<br>CF878972             | tr_74282                     | IPR009030                                                                                            | inducible cell wall protein                                                                          |
| STCD55                            |                                                                    | 1         | NADP(+)-dependent dehydrogenase, putative [ <i>Aspergillus clavatus</i> ]<br>XP_001269058.1            | 2e-117 | 107 bp | CF935625<br>CF869945<br>CF653652<br>CB900101<br>CF935099             | tr_123946                    | IPR002347<br>IPR002198                                                                               | GRD1                                                                                                 |
| STCD67                            |                                                                    | 1         | glycosyltransferase family 35 [ <i>Nectria haematococca</i> mpVI 77-13-4]<br>XP_003046680.1            | 0.0    | 278 bp | CF944364<br>BM076494<br>CB867726<br>CF881803<br>CF908472             | tr_120198<br>( <i>gph1</i> ) | IPR000811                                                                                            | glycogen phosphorylase GPH1, glycosyl transferase family 35, carbohydrate metabolism                 |
| STCD76                            |                                                                    | 1         | ATP synthase beta chain, mitochondrial precursor [ <i>Chaetomium globosum</i> CBS 148.51]              | 0.0    | 134 bp | CF876408<br>CF876393<br>CF874883<br>CF870779<br>CF870633             | tr_123071<br>( <i>atp2</i> ) | IPR000194<br>IPR005722<br>IPR003593<br>IPR000793<br>IPR004100                                        | ATP synthase beta chain, mitochondrial precursor, associated to cellulase signal transduction (PMID: |
| STCD82                            |                                                                    | 1         | ATP carrier protein [ <i>Neurospora crassa</i> OR74A]<br>XP_963201.1                                   | 8e-131 | 146 bp | CF944425<br>CF944116<br>CF883491<br>CF883338<br>CF881386             | tr_121834                    | IPR002113<br>IPR002067<br>IPR001993                                                                  | mitochondrial carrier protein                                                                        |
| STCD89                            |                                                                    | 1         | Pc12g07300 [ <i>Penicillium chrysogenum</i> Wisconsin 54-1255]<br>XP_002557565.1                       | 3e-11  | 230 bp | CF945334<br>BM077096<br>CF935759<br>CF935269<br>CF935219             | tr_71851                     | IPR011058                                                                                            | unkown                                                                                               |

A

wild type *grd1* locus

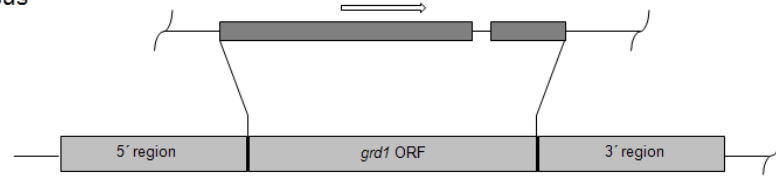

deletion cassette

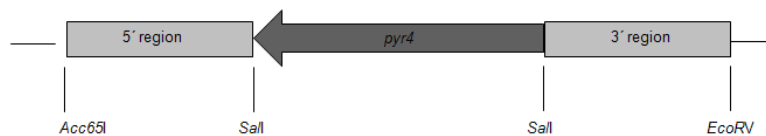

B

pLH1mcsHPH

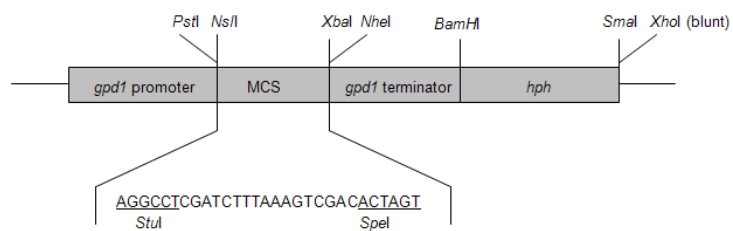

paGPD1hph

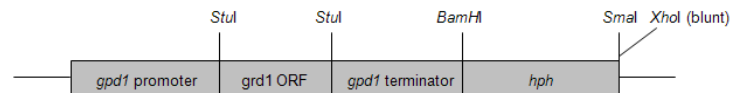

**Supplementary figure S1: Gene structure of *grd1*, deletion cassette (A), constitutive expression cassette and constitutive *grd1* expression cassette (B)**

(A) construction of a transformation cassette for deletion of *grd1* by replacing its open reading frame with the *pyr4* gene as a selection marker

(B) construction of a constitutive expression cassette under control of *gpd1* promoter and terminator, multiple cloning side was cloned into the *Pst*I - *Xba*I site with *Nsi*I - *Nhe*I. The hygromycin B resistance gen (*hph*) was cloned into the *Bam*HI – *Sma*I site (*Bam*HI – *Xho*I, blunt)

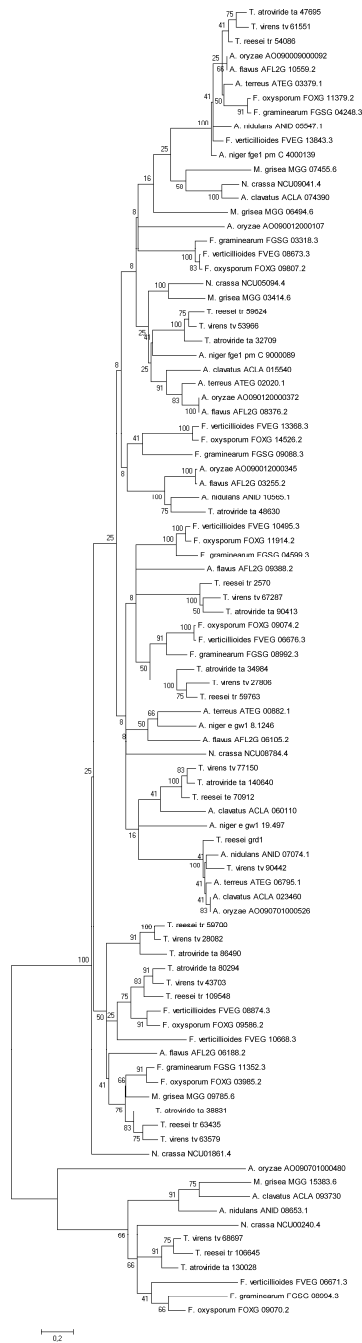

**Supplementary figure S2: Phylogenetic analysis of short chain dehydrogenases.** Analysis was done using the Minimum evolution method and 500 Bootstrap replications as test of phylogeny. Phylogenetic tree obtained by MEGA 4.0.2 and the sequences were obtained from the JGI *T. reesei* genome database V 2.0 (<http://genome.jgi-psf.org/Trire2/Trire2.home.html>) and the BROAD Database (<http://www.broadinstitute.org/scientific-community/data>).

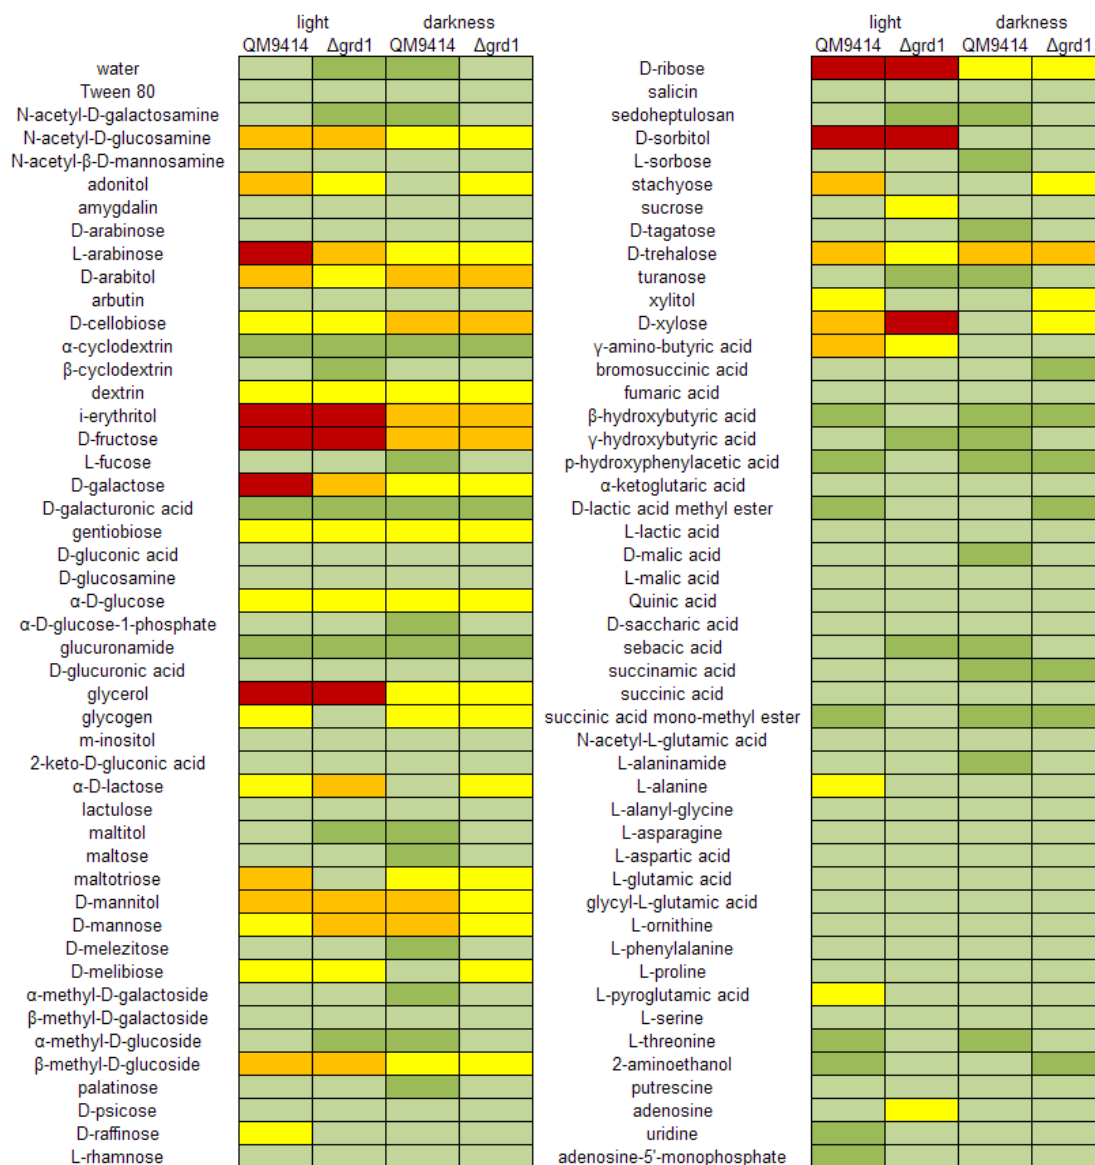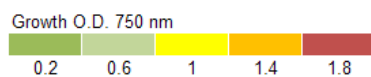

**Supplementary figure S3: Light stimulation of growth of *T. reesei* wild type QM9414 and  $\Delta$ grd1 on all 96 BIOLOG carbon sources.** Biomass equivalents (OD750) after 72 hrs of growth in constant darkness and constant illumination (1800 lux) are given.
